# Supplementary material
Source: publisher figshare collection journal article supplement (https://gsajournals.figshare.com/ndownloader/files/25452557)
Supplement: Supplementary file 1 [file 25452557]

## Sheet: Table S8
Table S8: Sources and metrics of rhabditid nematode genome data
Species	Clade	Reference	Genome size (Mb)	Karyotype
Oscheius tipulae	V	This work	60.9	6
Auanema rhodensis	V	(Tandonnet et al. 2019)	60.6	7
Caenorhabditis elegans	V	(C. elegans Sequencing Consortium 1998)	100.3	6
Caenorhabditis briggsae	V	(Stein et al. 2003)	108.4	6
Caenorhabditis nigoni	V	(Yin et al. 2018)	129.5	6
Caenorhabditis remanei	V	(Teterina et al. 2020)	124.8	6
Caenorhabditis inopinata	V	(Kanzaki et al. 2018)	123	6
Haemonchus contortus	V	(Laing et al. 2016)	283.4	6
Pristionchus pacificus	V	(Rödelsperger et al. 2017)	158.5	6
Steinernema carpocapsae	IV	(Serra et al. 2019)	84.5	5
Meloidogyne hapla	IV	(Opperman et al. 2008)	53	17
Strongyloides ratti	IV	(Nemetschke et al. 2010)	43.2	3
Ascaris suum	III	(Wang et al. 2020)	278.6	24
Onchocerca volvulus	III	(Cotton et al. 2016)	96.4	5
Brugia malayi	III	(Foster et al. 2020)	88.2	6
Species where Nigon loci where identified
Ascaris suum	III	(Wang et al., 2020)	278.6	24
Bursaphelenchus xylophilus	IV	(Dayi et al., 2020)	78.2	6
Bursaphelenchus okinawaensis	IV	(Sun et al., 2020)	70	6
Heterorhabditis bacteriophora	V	(Bai et al. 2013)	77	7
Diploscapter coronatus	V	(Hiraki et al. 2017)	170	1
Diploscapter pachys	V	(Fradin et al. 2017)	158	1
